# Supplementary material
Source: HighWire-hosted journal article supplement (https://gut.bmj.com/content/gutjnl-2023-331854)
Supplement: inline-supplementary-material-3 [file inline-supplementary-material-3.pdf]

## Supplemental materials

### qRT-PCR primers

#### Murine primers (5'→3'):

|                 |                              |                             |
|-----------------|------------------------------|-----------------------------|
| <i>mSaa1/2</i>  | CATGCTCGGGGGAAGTATGATGCTG    | CTGTTGGCTTCCTGGTCAGCAATGG   |
| <i>mSaa3</i>    | CATGCTCGGGGGAAGTATGATGCTG    | AAGTGGTTGGGGTCTTTGCCACTCC   |
| <i>mCxcl1</i>   | GAGGCTTGCTTGACCTGAAGCTC      | GTCAGAAGCCAGCGTTCACCAGACA   |
| <i>mIl6</i>     | TCCTTCTACCCCAATTTCCAATGCTC   | GGATGGTCTTGGTCCTTAGCCACTCCT |
| <i>mCsf3</i>    | TGGACTTGCTTCAGCTGGATGTTGC    | AGGCAGAAAGTGAAGGCTGGCATGG   |
| <i>mCol4a1</i>  | TCGCCACCATAGAGAGAAGCGAGATG   | ACCATGTTGTGACGGTGGCAGAGG    |
| <i>mCol1a1</i>  | TGGCAAAGACGGACTCAACGGTCTC    | GAAGTCATAACCGCCACTGGGAGGTC  |
| <i>mHas2</i>    | ACCCTATGGTTGGAGGTGTTGGAGGA   | CACGCTGCTGAGGAAGGAGATCCAG   |
| <i>mActa2</i>   | CCTGGAGAAGAGCTACGAACTGCCTGA  | TTTCGTGGATGCCGCTGACTC       |
| <i>mPkp1</i>    | TGCTTCAGCAACAGGGGTGACAAGA    | CATGAGGTTTAGGTAGGTCCGGATGG  |
| <i>mLif</i>     | GCAGCGCAATGCTCTCTTCATTTTC    | GCGCACATAGCTTTTCCACGTTGTTG  |
| <i>mTgfb1</i>   | GCAGAGCTGCGCTTGACAGAGATTAATA | ACTCAGGCGTATCAGTGGGGGTCAG   |
| <i>mTgfb2</i>   | TGAAAACACAGAGCGGAGGGTGAATG   | CACGAAAGTACAGCAGGGGTCAGTGT  |
| <i>mTgfb3</i>   | CTTCTGCTCAGGCCCTTGCCCATAC    | ACGCCTCTGGGTTTAGGGTGTGTA    |
| <i>mPai1</i>    | ATGGCCCCACGGAGATGGTTATAG     | CCATCACTTGCCCATGAAGAGGAT    |
| <i>mCyr61</i>   | AGTGCGTCCTTGTTGGACAACCAGTG   | AGCCGCAGTATTTGGGCCGATTTT    |
| <i>mGadd45a</i> | GCTGAGCTGCTGCTACTGGAGAACGA   | TAATCACGGGCACCCACTGATCCAT   |
| <i>mIrf1</i>    | CCAGGAACCAGAGGAAAGAGAGAAAG   | CATGGCGACAGTGTGGAGTC        |
| <i>mTnfa</i>    | GAAAGCATGATCCGGGACGTG        | GATGGCAGAGAGGAGGTTGAC       |
| <i>mIl1a</i>    | AAGGAGAAGACCAGCCCGTGTGTC     | ACCCGACTTTGTTCTTTGGTGGCAAT  |
| <i>mIl1b</i>    | GGCCTTGGGCTCAAAGGAAAGAAT     | TGCTGATGTACCAGTTGGGGAAGTCTG |
| <i>mArg1</i>    | CAAGACAGGGCTCCTTTTCAG        | GGCTTATGGTTACCCTCCCG        |
| <i>mCd163</i>   | GGCACTCTTGGTTTGTGGAG         | GCCTTTGAATCCATCTCTTGG       |
| <i>mCd24</i>    | TGCTGCTTCTGGCACTGCTCCTACC    | CCCCTCTGGTGGTAGCGTTACTTGGG  |
| <i>mPO</i>      | TGCACTCTCGCTTTCTGGAGGGTGT    | AATGCAGATGGATCAGCCAGGAAGG   |
|                 |                              |                             |
|                 |                              |                             |

**Human primers (5'->3'):**

|                                |                             |                           |
|--------------------------------|-----------------------------|---------------------------|
| <i>hTNF<math>\alpha</math></i> | GAAAGCATGATCCGGGACGTG       | GATGGCAGAGAGGAGGTTGAC     |
| <i>hIL6</i>                    | AACTCCTTCTCCACAAGCGCC       | GTGGGGCGGCTACATCTTT       |
| <i>hIRF1</i>                   | CCAGAGAAAAGAAAGAAAGTCAAGTCC | CATGGCGACAGTGCTGGAGTC     |
| <i>hIL1A</i>                   | GCCAAGATGAAGACCAACCAAGTGC   | TGCCGTGAGTTTCCAGAAGAAGAGG |
| <i>hIL1B</i>                   | TGAAAGCTCTCCACCTCCAGGGACA   | GAGGCCCAAGGCCACAGGTATTTG  |
| <i>hCCL18</i>                  | TGCTCCTGTGCACAAGTTGG        | CTGGGGGCTGGTTTCAGAAT      |
| <i>hCD163</i>                  | AATGGGAATTTATAACCCAGTGAG    | GGTGAATTTCTGCTCTCCATTCA   |
| <i>hCD24</i>                   | CCAAGCACCCAGCATCCTGCTAGAC   | GCATTAGTTGGATTTGGGGCCAACC |
| <i>hPO</i>                     | CCTTCTCCTTTGGGCTGGTCATCCA   | CAGACACTGGCAACATTGCGGACAC |
|                                |                             |                           |

**List of antibodies**

| <b>Antibody</b>         | <b>Company</b>            | <b>Order #</b>                  | <b>Application</b>              |
|-------------------------|---------------------------|---------------------------------|---------------------------------|
| DYRK1B                  | BioOrbyt                  | orb318969                       | IHC                             |
| DYRK1B                  | Cell Signaling Technology | #5672                           | WB                              |
| β-Actin                 | Sigma                     | A5441                           | WB                              |
| BrdU                    | Biozol                    | BLD-364104 (FITC)               | Flow cytometry                  |
| αSMA                    | Cell Signaling Technology | 19245                           | IHC                             |
| PDGFRβ                  | Cell Signaling Technology | 3169                            | IHC                             |
| F4/80                   | Cell Signaling Technology | 70076                           | IHC                             |
| Ki67                    | Abcam                     | ab15580                         | IHC                             |
| CD31                    | Cell Signaling Technology | 77699                           | IHC                             |
| CD24                    | Abcam                     | ab290730 (mouse-spec.)          | WB                              |
| CD24                    | BD Biosciences            | 555426, Clone ML5 (human-spec.) | WB                              |
| CD24 (PE)               | Miltenyi                  | 130-112-845 (human-spec.)       | Flow cytometry                  |
| CD24 (PE)               | Miltenyi                  | 130-103-371 (mouse-spec.)       | Flow cytometry                  |
| IgG (PE)                | Miltenyi                  | 130-113-438 (human)             | Isotype control, Flow cytometry |
| IgG (PE)                | Biolegend                 | 400608 (mouse)                  | Isotype control, Flow cytometry |
| CD68                    | Dako/Agilent              | M0876, Clone PG-M1              | IHC                             |
| M-CSF                   | Biotechne/Novus           | AF416-SP                        | Neutralizing Ab                 |
| CCL5                    | Biotechne/Novus           | AF478-SP                        | Neutralizing Ab                 |
| CCL6                    | Biotechne/Novus           | AF487-SP                        | Neutralizing Ab                 |
| CXCL2                   | Biotechne/Novus           | AF452-SP                        | Neutralizing Ab                 |
| FcR Blocking            | Miltenyi                  | 130-059-901 (human-spec.)       | Flow cytometry                  |
| Cd16/32 FcR blocking    | Biolegend                 | 101330 (mouse-spec.)            | Flow cytometry                  |
| CD206 (Alexa 647)       | Cell Signaling Technology | #43920                          | Tissue IF                       |
| F4/80 (Alexa 555)       | Cell Signaling Technology | #99651                          | Tissue IF                       |
| Ki67 (Alexa 647)        | Cell Signaling Technology | #12075                          | Tissue IF                       |
| Pan-Keratin (Alexa 488) | Cell Signaling Technology | #4523                           | Tissue IF                       |
| TNF-alpha               | Biotechne                 | AF-410-NA                       | Tissue IF                       |
| F4/80 (APC)             | Ebioscience               | 14-480-82                       | Flow cytometry                  |
| MHCII (APC-Cy7)         | Biolegend                 | 107628                          | Flow cytometry                  |
| CD206 (PerCP-Cy5.5)     | Biolegend                 | 141715                          | Flow cytometry                  |
| CD45 (VioBlue)          | Miltenyi                  | 130-110-802                     | Flow cytometry                  |
| CD4 (Brilliant violet)  | Ebioscience               | 48-0041-82                      | Flow cytometry                  |

|                       |               |            |                |
|-----------------------|---------------|------------|----------------|
| CD8 (PerCP-Cy5.5)     | Biolegend     | 100732     | Flow cytometry |
| IFN $\gamma$ (PE-Cy7) | Biolegend     | 505826     | Flow cytometry |
| TNF (FITC)            | Ebioscience   | 11-7321-82 | Flow cytometry |
| Tbet (PE-Cy7)         | Biolegend     | 644824     | Flow cytometry |
| ROR $\gamma$ t        | BD Bioscience | 563081     | Flow cytometry |
