# Supplementary material
Source: HighWire-hosted journal article supplement (https://gut.bmj.com/content/gutjnl-2023-331854)
Supplement: inline-supplementary-material-9 [file inline-supplementary-material-9.pdf]

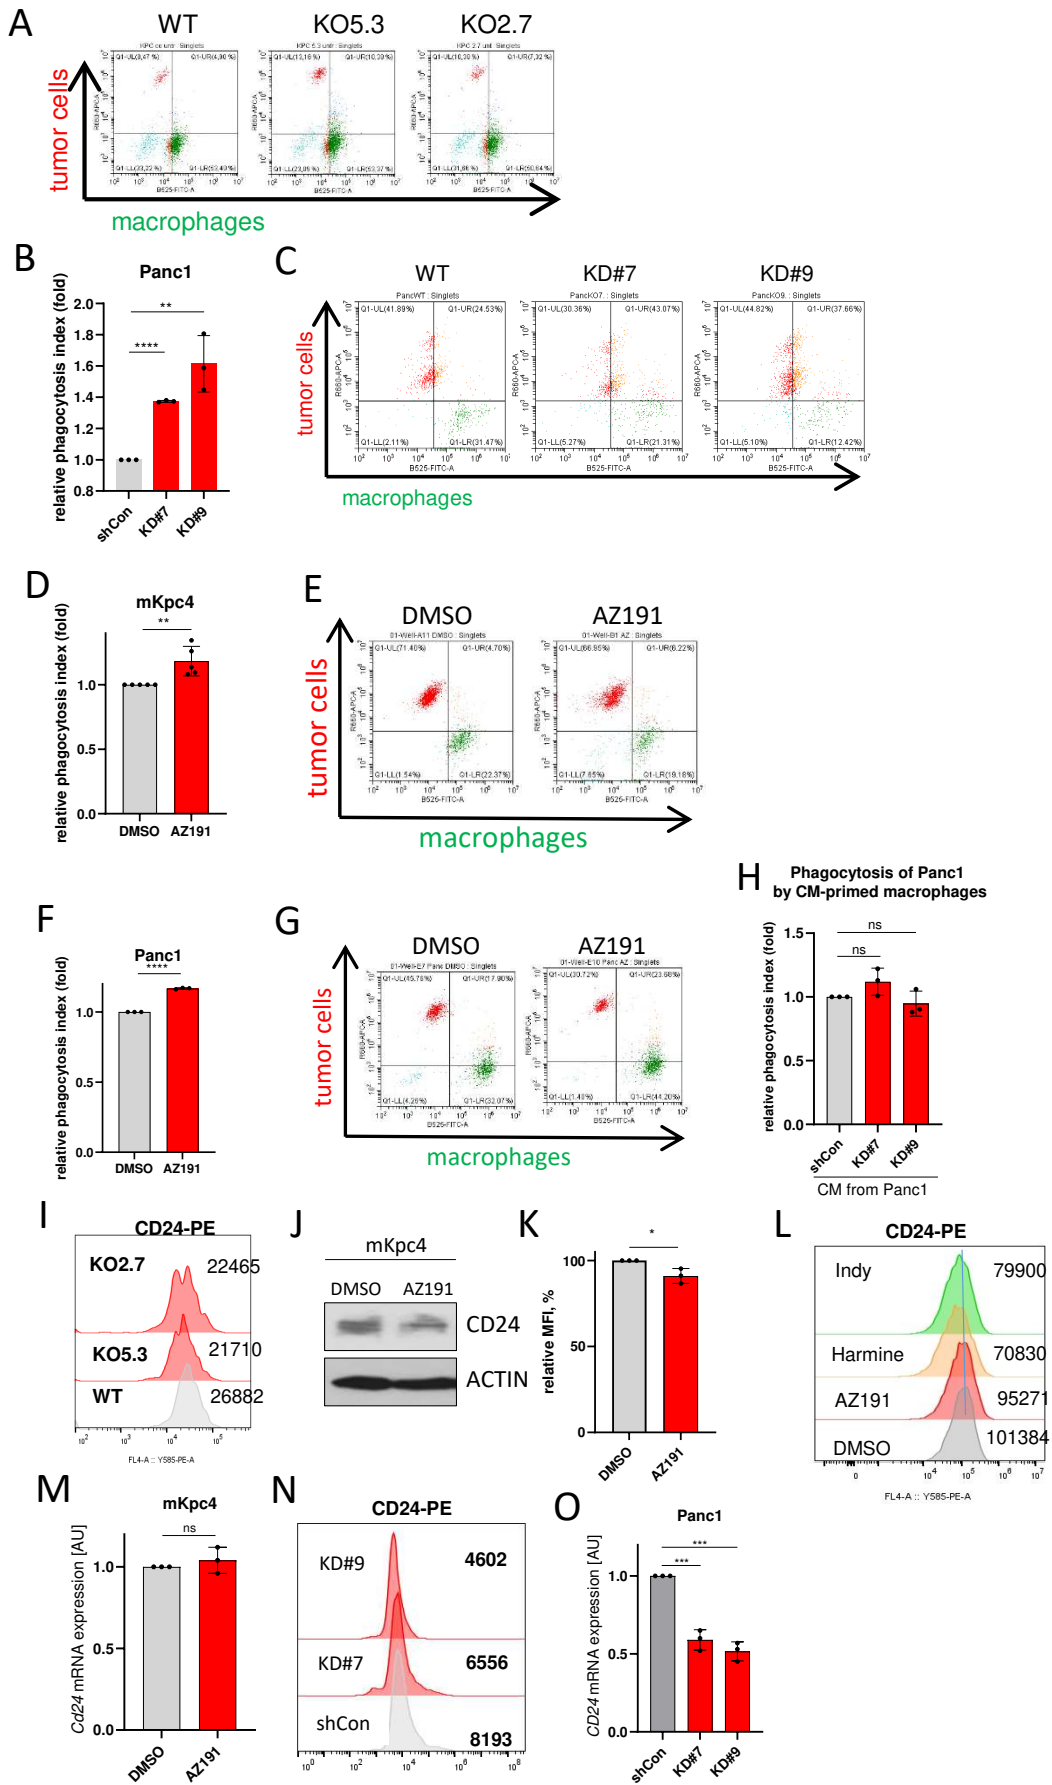

- Figure S5 -
