# Supplementary material
Source: HighWire-hosted journal article supplement (https://gut.bmj.com/content/gutjnl-2023-331854)
Supplement: inline-supplementary-material-10 [file inline-supplementary-material-10.pdf]

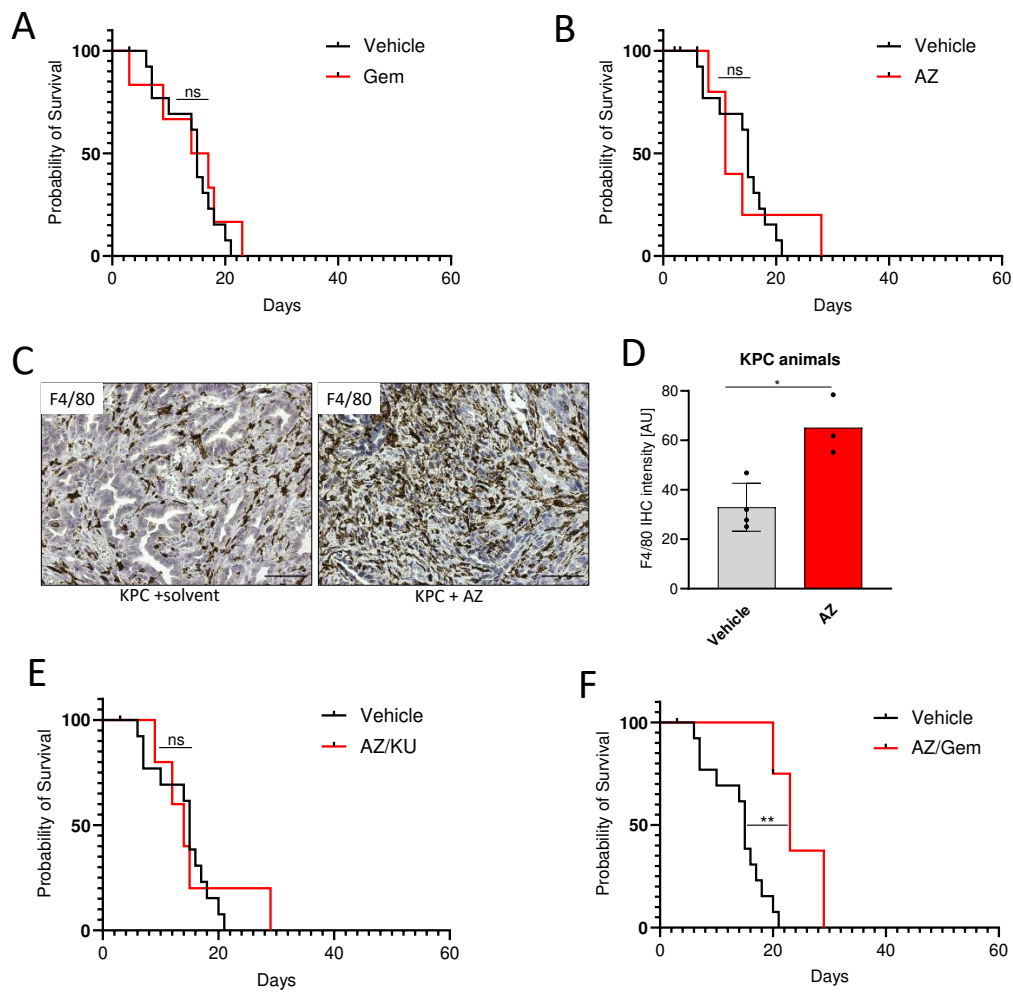

- Figure S6 -
